# Supplementary material for: Chondroitin sulfate-polydopamine modified polyethylene terephthalate with extracellular matrix-mimetic immunoregulatory functions for osseointegration
Source: Royal Society of Chemistry journal article supplement (doi:10.1039/c9tb01984g), 2019-01-01
Supplement: c9tb01984g1.pdf [file c9tb01984g1.pdf]

## SUPPLEMENTARY INFORMATION

### Supplementary Figures

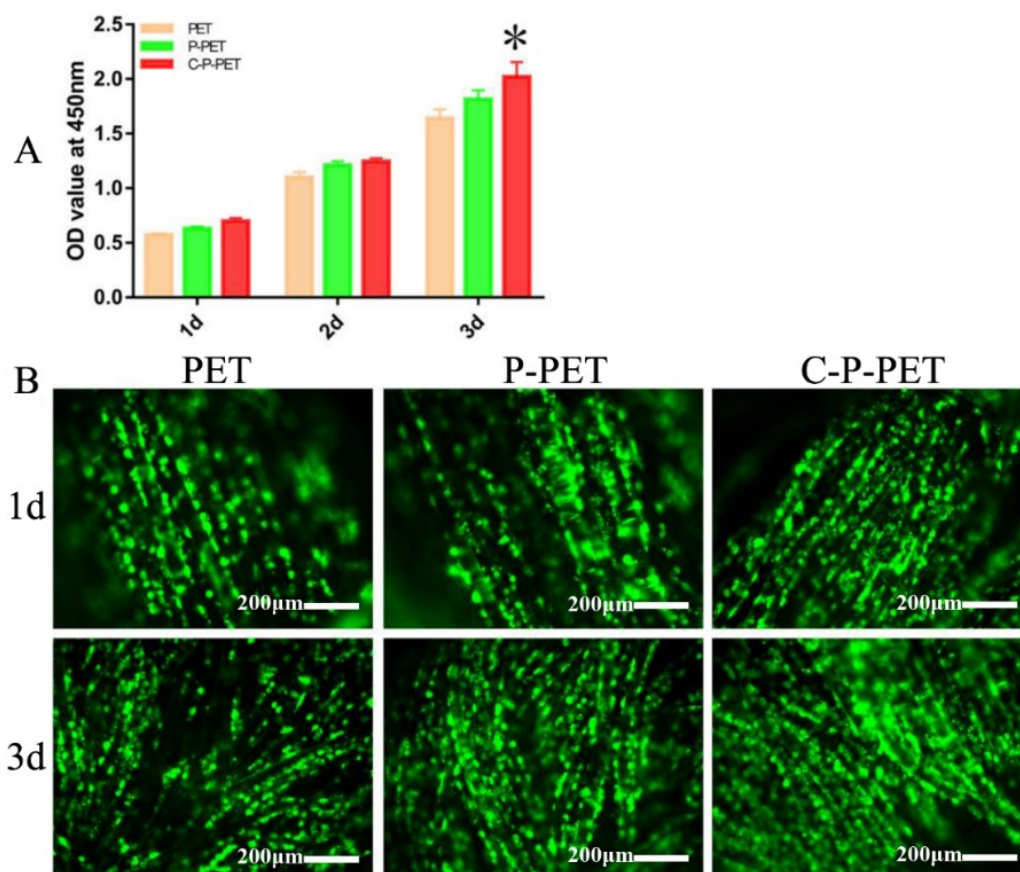

**Supplementary Figure 1.** Proliferation and attachment of RAW 264.7 cells onto grafts. (A) CCK8 assay and (B) live/dead staining of RAW 264.7 cells on PET, P-PET, C-P-PET. Results are means  $\pm$  SD; \* $p < 0.05$  compared to PET group.
